# Supplementary material for: Cardiac ryanodine receptor distribution is dynamic and changed by auxiliary proteins and post-translational modification
Source: eLife journal article supplement (doi:10.7554/elife.51602), 2020-01-09
Supplement: supp [file elife-51602-supp-v1.zip]

## Figure 1 – Source Data 1

### A) Quartiles

#### Normalized Spark Frequency – Quartiles

| Condition       | 0%   | 25%  | 50%  | 75%  | 100% |
|-----------------|------|------|------|------|------|
| Control         | 0.33 | 0.65 | 0.98 | 1.31 | 1.64 |
| Phos            | 1.07 | 1.52 | 2.77 | 3.67 | 5.12 |
| FKBP12          | 0.00 | 0.12 | 0.27 | 0.36 | 0.84 |
| FKBP12 + Phos   | 0.74 | 1.47 | 1.84 | 2.57 | 2.94 |
| FKBP12.6        | 0.00 | 0.27 | 0.41 | 0.54 | 1.08 |
| FKBP12.6 + Phos | 2.27 | 3.33 | 3.97 | 4.54 | 5.10 |

#### Amplitude - Quartiles

| Condition       | 0%   | 25%  | 50%  | 75%  | 100% |
|-----------------|------|------|------|------|------|
| Control         | 0.35 | 0.65 | 0.98 | 1.63 | 4.11 |
| Phos            | 0.42 | 0.92 | 1.27 | 1.82 | 3.61 |
| FKBP12          | 0.35 | 0.61 | 0.81 | 1.20 | 3.99 |
| FKBP12 + Phos   | 0.46 | 0.83 | 1.31 | 2.00 | 4.11 |
| FKBP12.6        | 0.33 | 0.52 | 0.77 | 1.64 | 3.08 |
| FKBP12.6 + Phos | 0.35 | 0.82 | 1.47 | 1.77 | 4.08 |

#### Full Duration Half Maximum (FDHM) - -Quartiles

| Condition       | 0%   | 25%   | 50%   | 75%   | 100%  |
|-----------------|------|-------|-------|-------|-------|
| Control         | 5.70 | 12.35 | 16.14 | 19.23 | 36.09 |
| Phos            | 5.70 | 12.35 | 17.09 | 23.27 | 51.28 |
| FKBP12          | 3.80 | 9.50  | 11.88 | 14.25 | 30.39 |
| FKBP12 + Phos   | 3.80 | 12.59 | 16.14 | 20.89 | 34.19 |
| FKBP12.6        | 6.65 | 9.74  | 14.25 | 18.04 | 51.28 |
| FKBP12.6 + Phos | 1.90 | 17.09 | 22.79 | 28.49 | 78.82 |

#### Full Width Half Maximum (FWHM) - Quartiles

| Condition       | 0%   | 25%  | 50%  | 75%  | 100% |
|-----------------|------|------|------|------|------|
| Control         | 0.99 | 2.13 | 2.41 | 2.84 | 3.98 |
| Phos            | 1.14 | 2.13 | 2.56 | 2.84 | 4.69 |
| FKBP12          | 0.71 | 1.70 | 2.13 | 2.41 | 3.55 |
| FKBP12 + Phos   | 0.99 | 1.85 | 2.13 | 2.41 | 4.26 |
| FKBP12.6        | 0.99 | 1.56 | 1.70 | 1.99 | 3.12 |
| FKBP12.6 + Phos | 0.57 | 1.99 | 2.27 | 2.56 | 4.97 |

#### Spark Mass - Quartiles

| Condition       | 0%    | 25%   | 50%   | 75%    | 100%   |
|-----------------|-------|-------|-------|--------|--------|
| Control         | 3.82  | 19.66 | 37.29 | 66.00  | 212.35 |
| Phos            | 10.56 | 31.87 | 53.60 | 90.38  | 458.37 |
| FKBP12          | 1.82  | 10.63 | 22.81 | 36.74  | 330.93 |
| FKBP12 + Phos   | 2.01  | 28.24 | 46.69 | 70.90  | 188.15 |
| FKBP12.6        | 3.12  | 10.36 | 19.48 | 51.30  | 127.42 |
| FKBP12.6 + Phos | 0.52  | 28.42 | 70.39 | 109.99 | 711.09 |

## B) Spark Parameters – Statistical Analyses

| Spark Freq/Ca Load              | HDA         |                 |                  |                 |
|---------------------------------|-------------|-----------------|------------------|-----------------|
|                                 | p Value     | Bonferroni sig. | Critical p Value | Null Hypothesis |
| Control - FKBP12                | 1.93957E-03 | *               | 0.0250           | REJECT          |
| Control - FKBP12.6              | 1.78197E-03 | *               | 0.0167           | REJECT          |
| Control - FKBP12.6 + Phos       | 8.14389E-22 | ***             | 0.0042           | REJECT          |
| Control - FKBP12 + Phos         | 5.88808E-06 | ***             | 0.0083           | REJECT          |
| Control - Phosph                | 5.58734E-14 | ***             | 0.0050           | REJECT          |
| FKBP12.6 - FKBP12.6 + Phos      | 3.28820E-29 | ***             | 0.0033           | REJECT          |
| FKBP12 + Phos - FKBP12.6        | 1.13080E-12 | ***             | 0.0071           | REJECT          |
| FKBP12 + Phos - FKBP12.6 + Phos | 9.57428E-13 | ***             | 0.0056           | REJECT          |
| FKBP12 - FKBP12.6               | 8.04323E-01 |                 | 0.0500           |                 |
| FKBP12 - FKBP12.6 + Phos        | 2.60691E-26 | ***             | 0.0036           | REJECT          |
| FKBP12 - FKBP12 + Phos          | 1.08997E-12 | ***             | 0.0063           | REJECT          |
| Phos - FKBP12                   | 6.75885E-22 | ***             | 0.0038           | REJECT          |
| Phos - FKBP12+Phos              | 1.88772E-04 | **              | 0.0125           | REJECT          |
| Phos - FKBP12.6                 | 9.55791E-22 | ***             | 0.0045           | REJECT          |
| Phos - FKBP12.6+Phos            | 1.37412E-05 | ***             | 0.0100           | REJECT          |

| Log Amplitude                   | HDA         |                 |                  |                 |
|---------------------------------|-------------|-----------------|------------------|-----------------|
|                                 | p Value     | Bonferroni sig. | Critical p Value | Null Hypothesis |
| Control - FKBP12                | 1.04861E-05 | ***             | 0.0038           | REJECT          |
| Control - FKBP12 + Phos         | 9.31841E-01 |                 | 0.0500           |                 |
| Control - FKBP12.6              | 9.11395E-05 | **              | 0.0050           | REJECT          |
| Control - FKBP12.6 + Phos       | 5.01714E-01 |                 | 0.0167           |                 |
| Control - Phos                  | 4.50906E-01 |                 | 0.0100           |                 |
| FKBP12 - FKBP12 + Phos          | 7.55375E-06 | ***             | 0.0033           | REJECT          |
| FKBP12 - FKBP12.6               | 8.32945E-01 |                 | 0.0250           |                 |
| FKBP12 - FKBP12.6 + Phos        | 8.67841E-06 | ***             | 0.0036           | REJECT          |
| FKBP12 + Phos - FKBP12.6        | 3.58709E-05 | ***             | 0.0045           | REJECT          |
| FKBP12 + Phos - FKBP12.6 + Phos | 4.28549E-01 |                 | 0.0083           |                 |
| FKBP12.6 - FKBP12.6 + Phos      | 1.32935E-05 | ***             | 0.0042           | REJECT          |
| Phos - FKBP12                   | 1.18239E-04 | **              | 0.0056           | REJECT          |
| Phos - FKBP12 + Phos            | 4.60517E-01 |                 | 0.0125           |                 |
| Phos - FKBP12.6                 | 4.84750E-04 | **              | 0.0063           | REJECT          |
| Phos - FKBP12.6 + Phos          | 1.75157E-01 |                 | 0.0071           |                 |

Signif. Codes: Bonferroni p < 0.0001 '\*\*\*'; p < 0.001 '\*\*'; p < 0.05 '\*'

| Log FWHM                        | HDA         | Bonferroni sig. | Holm-Bonferroni  |                 |
|---------------------------------|-------------|-----------------|------------------|-----------------|
|                                 | p Value     |                 | Critical p Value | Null Hypothesis |
| Control - FKBP12                | 1.36242E-05 | ***             | 0.0045           | REJECT          |
| Control - FKBP12 + Phos         | 9.72653E-03 |                 | 0.0071           |                 |
| Control - FKBP12.6              | 6.04275E-07 | ***             | 0.0038           | REJECT          |
| Control - FKBP12.6 + Phos       | 8.42478E-01 |                 | 0.0500           |                 |
| Control - Phos                  | 2.31312E-01 |                 | 0.0125           |                 |
| FKBP12 - FKBP12 + Phos          | 2.71783E-02 |                 | 0.0100           |                 |
| FKBP12 - FKBP12.6               | 3.13378E-01 |                 | 0.0167           |                 |
| FKBP12 - FKBP12.6 + Phos        | 5.99562E-05 | ***             | 0.0050           | REJECT          |
| FKBP12 + Phos - FKBP12.6        | 1.29424E-03 | *               | 0.0063           | REJECT          |
| FKBP12 + Phos - FKBP12.6 + Phos | 1.07433E-02 |                 | 0.0083           |                 |
| FKBP12.6 - FKBP12.6 + Phos      | 6.70286E-07 | ***             | 0.0042           | REJECT          |
| Phos - FKBP12                   | 5.85344E-08 | ***             | 0.0036           | REJECT          |
| Phos - FKBP12 + Phos            | 8.52244E-05 | **              | 0.0056           | REJECT          |
| Phos - FKBP12.6                 | 8.95653E-10 | ***             | 0.0033           | REJECT          |
| Phos - FKBP12.6 + Phos          | 3.81428E-01 |                 | 0.0250           |                 |

| Log FDHM                        | HDA         | Bonferroni sig. | Holm-Bonferroni  |                 |
|---------------------------------|-------------|-----------------|------------------|-----------------|
|                                 | p Value     |                 | Critical p Value | Null Hypothesis |
| Control - FKBP12                | 3.70342E-03 |                 | 0.0063           | REJECT          |
| Control - FKBP12 + Phos         | 1.83813E-01 |                 | 0.0167           |                 |
| Control - FKBP12.6              | 6.03849E-01 |                 | 0.0500           |                 |
| Control - FKBP12.6 + Phos       | 2.22245E-06 | ***             | 0.0042           | REJECT          |
| Control - Phos                  | 2.79745E-02 |                 | 0.0083           |                 |
| FKBP12 - FKBP12 + Phos          | 3.21064E-05 | ***             | 0.0045           | REJECT          |
| FKBP12 - FKBP12.6               | 3.01389E-02 |                 | 0.0100           |                 |
| FKBP12 - FKBP12.6 + Phos        | 5.45550E-11 | ***             | 0.0033           | REJECT          |
| FKBP12 + Phos - FKBP12.6        | 7.44477E-02 |                 | 0.0125           |                 |
| FKBP12 + Phos - FKBP12.6 + Phos | 1.08502E-04 | **              | 0.0050           | REJECT          |
| FKBP12.6 - FKBP12.6 + Phos      | 3.49299E-07 | ***             | 0.0036           | REJECT          |
| Phos - FKBP12                   | 1.07112E-06 | ***             | 0.0038           | REJECT          |
| Phos - FKBP12 + Phos            | 3.24937E-01 |                 | 0.0250           |                 |
| Phos - FKBP12.6                 | 9.77440E-03 |                 | 0.0071           |                 |
| Phos - FKBP12.6 + Phos          | 2.63050E-03 | *               | 0.0056           | REJECT          |

Signif. Codes: Bonferroni p < 0.0001 '\*\*\*'; p < 0.001 '\*\*'; p < 0.05 '\*'

| Log Spark Mass                  | HDA         | Bonferroni sig. | Holm-Bonferroni  |                 |
|---------------------------------|-------------|-----------------|------------------|-----------------|
|                                 | p Value     |                 | Critical p Value | Null Hypothesis |
| Control - FKBP12                | 6.79403E-07 | ***             | 0.0045           | REJECT          |
| Control - FKBP12 + Phos         | 8.77939E-01 |                 | 0.0500           |                 |
| Control - FKBP12.6              | 1.68780E-04 | **              | 0.0063           | REJECT          |
| Control - FKBP12.6 + Phos       | 7.00849E-03 |                 | 0.0083           | REJECT          |
| Control - Phos                  | 5.05752E-01 |                 | 0.0250           |                 |
| FKBP12 - FKBP12 + Phos          | 5.92590E-07 | ***             | 0.0042           | REJECT          |
| FKBP12 - FKBP12.6               | 3.53118E-01 |                 | 0.0125           |                 |
| FKBP12 - FKBP12.6 + Phos        | 1.21465E-10 | ***             | 0.0033           | REJECT          |
| FKBP12 + Phos - FKBP12.6        | 8.84271E-05 | **              | 0.0056           | REJECT          |
| FKBP12 + Phos - FKBP12.6 + Phos | 2.92968E-03 | *               | 0.0071           | REJECT          |
| FKBP12.6 - FKBP12.6 + Phos      | 4.03930E-09 | ***             | 0.0036           | REJECT          |
| Phos - FKBP12                   | 2.92260E-08 | ***             | 0.0038           | REJECT          |
| Phos - FKBP12 + Phos            | 3.71282E-01 |                 | 0.0167           |                 |
| Phos - FKBP12.6                 | 6.94202E-06 | ***             | 0.0050           | REJECT          |
| Phos - FKBP12.6 + Phos          | 2.88229E-02 |                 | 0.0100           |                 |

Signif. Codes: Bonferroni  $p < 0.0001$  '\*\*\*';  $p < 0.001$  '\*\*';  $p < 0.05$  '\*'
