# Supplementary material for: Cardiac ryanodine receptor distribution is dynamic and changed by auxiliary proteins and post-translational modification
Source: eLife journal article supplement (doi:10.7554/elife.51602), 2020-01-09
Supplement: supp [file elife-51602-supp-v1.zip]

Figure 6 - Source Data 1

Statistical analysis for Figure 6C: CDF plot of Alpha Shape Areas

Using the Anderson-Darling k sample test (corrected for ties)

Alpha Shape Areas

All Groups:  $p = 0$  - SIGNIFICANT

Control vs phosphorylated:  $p = 1.0904e-26$  - SIGNIFICANT

Control vs FKBP12:  $p = 0$  - SIGNIFICANT

Control vs FKBP12.6:  $p = 0$  - SIGNIFICANT

Control vs FKBP12 phos:  $p = 5.9079e-146$  - SIGNIFICANT

Control vs FKBP12.6 phos:  $p = 1.0261e-19$  - SIGNIFICANT

FKBP12 vs FKBP12 phos:  $p = 0$  - SIGNIFICANT

FKBP12.6 vs FKBP12.6 phos:  $p = 0$  - SIGNIFICANT

FKBP12 vs FKBP12.6:  $p = 0.38377$  - NS

FKBP12 phos vs FKBP12.6 phos:  $p = 0$  - SIGNIFICANT

Phosphorylated vs FKBP12 phos:  $p = 6.9547e-05$  - SIGNIFICANT

Phosphorylated vs FKBP12.6 phos:  $p = 0.2336$  - NS
