# Supplementary material for: Cardiac ryanodine receptor distribution is dynamic and changed by auxiliary proteins and post-translational modification
Source: eLife journal article supplement (doi:10.7554/elife.51602), 2020-01-09
Supplement: supp [file elife-51602-supp-v1.zip]

Figure 6 - Source Data 2

Statistical Analysis for Figure 6E – CDFs of Tetramers Per Cluster

Using the Anderson-Darling k sample test (corrected for ties)

Tetramers per Cluster

All Groups :  $p = 0$  - SIGNIFICANT

Control vs phosphorylated:  $p = 1.414e-128$  - SIGNIFICANT

Control vs FKBP12:  $p = 0$  - SIGNIFICANT

Control vs FKBP12.6:  $p = 0$  - SIGNIFICANT

Control vs FKBP12 phos:  $p = 4.0762e-13$  - SIGNIFICANT

Control vs FKBP12.6 phos:  $p = 7.9987e-05$  - SIGNIFICANT

FKBP12 vs FKBP12 phos:  $p = 0$  - SIGNIFICANT

FKBP12.6 vs FKBP12.6 phos:  $p = 0$  - SIGNIFICANT

FKBP12 vs FKBP12.6:  $p = 2.8133e-12$  - SIGNIFICANT

FKBP12 phos vs FKBP12.6 phos:  $p = 0.041946$  - SIGNIFICANT

Phosphorylated vs FKBP12 phos:  $p = 1.4053e-120$  - SIGNIFICANT

Phosphorylated vs FKBP12.6 phos:  $p = 7.7567e-18$  - SIGNIFICANT
