# Supplementary material for: Cardiac ryanodine receptor distribution is dynamic and changed by auxiliary proteins and post-translational modification
Source: eLife journal article supplement (doi:10.7554/elife.51602), 2020-01-09

Figure 8 – figure supplement 2

Control

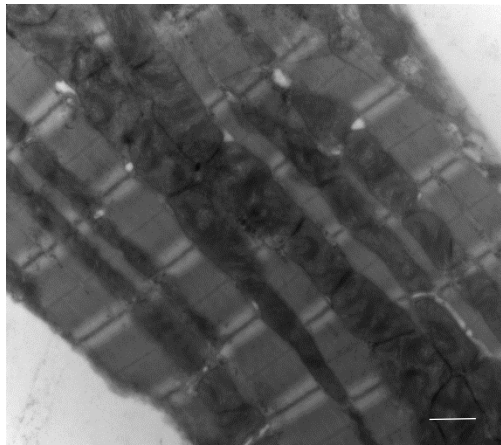

Phosphorylation cocktail

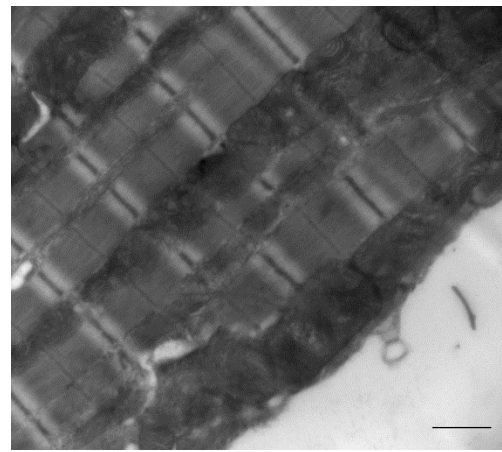

FKBP12.6

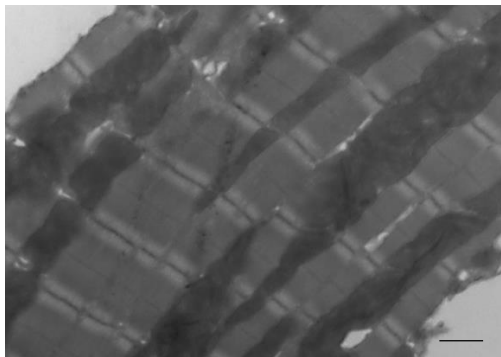

FKBP12

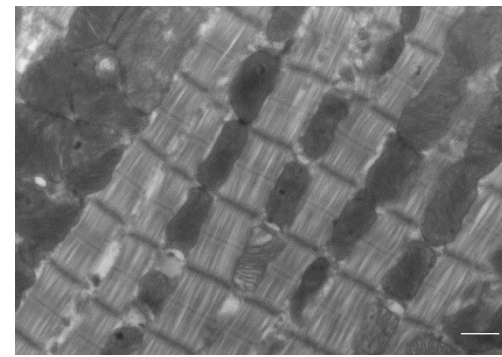

FKBP12.6 and the phosphorylation cocktail

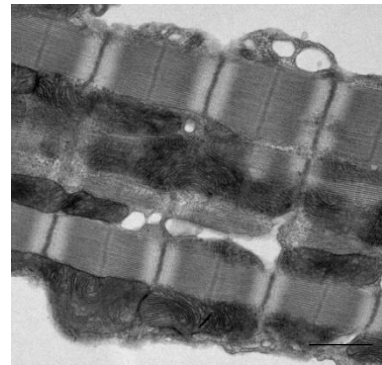

FKBP12 and the phosphorylation cocktail

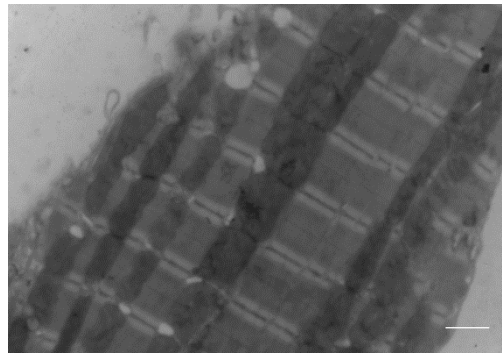

Supplement: supp [file elife-51602-supp-v1.zip]
