# Supplementary material for: Cardiac ryanodine receptor distribution is dynamic and changed by auxiliary proteins and post-translational modification
Source: eLife journal article supplement (doi:10.7554/elife.51602), 2020-01-09

**Figure 8 – figure supplement 1**

**a Data Collection**

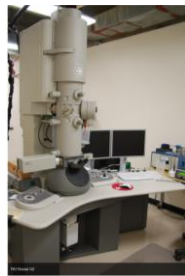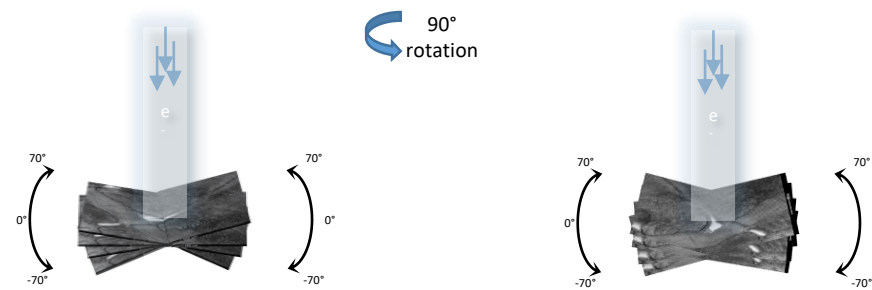

The mapped junction is found and dual tilt-series collected over  $\pm 70$  at  $1^\circ$  increments

**b Reconstruction**

**i First Single tilt series**

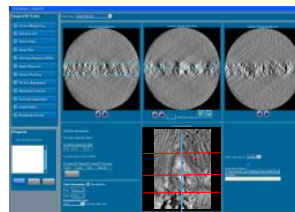

**Second Single tilt series**

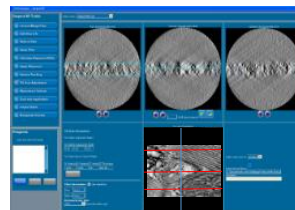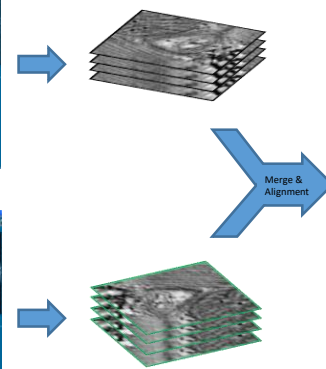

**ii**

Dual tilt alignments using Amira

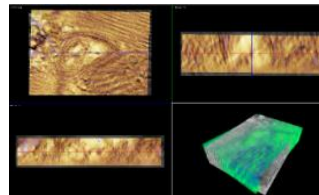

Single tilt-series reconstructions using Inspect 3D software, tilt-series are back-projected to form tomograms-stored as slices along Z

**c Modeling and Analysis**

Multiplanner view of the dual tilt aligned tomogram for tetramer localization and orientation

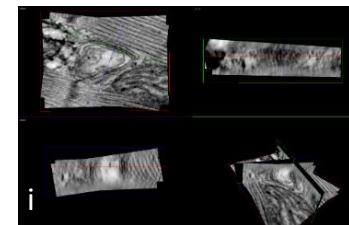

Manual segmentation and Modeling of the dual tilt aligned tomogram

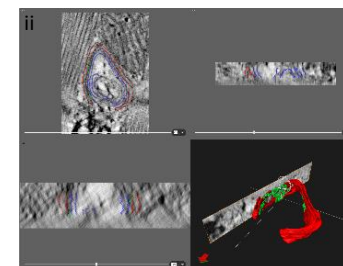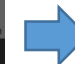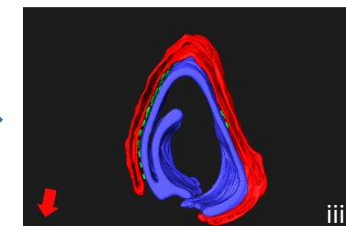

Supplement: supp [file elife-51602-supp-v1.zip]
