# Supplementary material for: Cardiac ryanodine receptor distribution is dynamic and changed by auxiliary proteins and post-translational modification
Source: eLife journal article supplement (doi:10.7554/elife.51602), 2020-01-09
Supplement: supp [file elife-51602-supp-v1.zip]

Figure 7 - Source Data 1

| p-values                                        |             |             |                 |                          |                            |
|-------------------------------------------------|-------------|-------------|-----------------|--------------------------|----------------------------|
| t-test /two tailed – Paired, compare to control | fkbp12      | fkbp12.6    | phosphorylation | fkbp12 + phosphorylation | fkbp12.6 + phosphorylation |
| SF6B (FKBP/RyR2)                                | 0.011350218 | 0.039222629 | 0.0540984       | 0.03906                  | 0.020219685                |
| SF6 C (FKBP/CSQ)                                | 0.003260149 | 0.000576786 | 0.3896027       | 0.019909                 | 0.0298508                  |

| t-test /two tailed – Paired, compare to Phosphorylation | fkbp12+phosphorylation | fkbp12.6+phosphorylation |
|---------------------------------------------------------|------------------------|--------------------------|
| SF6B (FKBP/RyR2)                                        | 0.0426138              | 0.022610269              |
| SF6 C (FKBP/CSQ)                                        | 0.0194692              | 0.017272928              |

| t-test /two tailed – Paired, compare to fkbp12 | fkbp12.6  | t-test /two tailed – Paired, compare to fkbp12 | fkbp12 + phosphorylation | t-test /two tailed – Paired, compare to fkbp12.6 | Fkbp12.6 + phosphorylation |
|------------------------------------------------|-----------|------------------------------------------------|--------------------------|--------------------------------------------------|----------------------------|
| SF6B (FKBP/RyR2)                               | 0.1537099 | SF6B (FKBP/RyR2)                               | 0.065443517              | SF6B (FKBP/RyR2)                                 | 0.106742973                |
| SF6 C (FKBP/CSQ)                               | 0.0548166 | SF6 C (FKBP/CSQ)                               | 0.107984018              | SF6 C (FKBP/CSQ)                                 | 0.454997981                |

| p-values                           |             |          |                 |                        |                          |
|------------------------------------|-------------|----------|-----------------|------------------------|--------------------------|
| student T- Test compare to control | fkbp12      | fkbp12.6 | phosphorylation | phosphorylation+fkbp12 | phosphorylation+fkbp12.6 |
| SF6E (RyR2 p-S2814/CSQ)            | 0.381272455 | 0.489605 | 0.00112         | 0.044864041            | 0.019325                 |
