# Supplementary material for: Cardiac ryanodine receptor distribution is dynamic and changed by auxiliary proteins and post-translational modification
Source: eLife journal article supplement (doi:10.7554/elife.51602), 2020-01-09
Supplement: supp [file elife-51602-supp-v1.zip]

**Figure 1 – figure supplement 1**

| <b>Experimental Group</b>           | <b>Sparks Analysed</b> | <b>Cells</b> | <b>Rats</b> |
|-------------------------------------|------------------------|--------------|-------------|
| Control                             | 167                    | 25           | 3           |
| Phosphorylation cocktail            | 239                    | 20           | 4           |
| FKBP12                              | 99                     | 31           | 4           |
| FKBP12 + phosphorylation cocktail   | 186                    | 20           | 3           |
| FKBP12.6                            | 77                     | 23           | 4           |
| FKBP12.6 + phosphorylation cocktail | 187                    | 15           | 3           |
