# Supplementary material for: Cardiac ryanodine receptor distribution is dynamic and changed by auxiliary proteins and post-translational modification
Source: eLife journal article supplement (doi:10.7554/elife.51602), 2020-01-09
Supplement: supp [file elife-51602-supp-v1.zip]

Figure 5 - Source Data 1

Statistical analysis for Figure 5: CDF plot of NNDs

Using the Anderson-Darling k sample test (corrected for ties)

NNDs between tetramers

All Groups:  $p = 0$  - SIGNIFICANT

Control vs phosphorylated:  $p = 0.0063183$  - SIGNIFICANT

Control vs FKBP12:  $p = 1.498e-26$  - SIGNIFICANT

Control vs FKBP12.6:  $p = 0$  - SIGNIFICANT

Control vs FKBP12 phos:  $p = 0.15442$  - NS

Control vs FKBP12.6 phos:  $p = 2.7804e-11$  - SIGNIFICANT

FKBP12 vs FKBP12 phos:  $p = 3.9539e-79$  - SIGNIFICANT

FKBP12.6 vs FKBP12.6 phos:  $p = 0$  - SIGNIFICANT

FKBP12 vs FKBP12.6:  $p = 8.153e-10$  - SIGNIFICANT

FKBP12 phos vs FKBP12.6 phos:  $p = 0$  - SIGNIFICANT

Phosphorylated vs FKBP12 phos:  $p = 0.20261$  - NS

Phosphorylated vs FKBP12.6 phos:  $p = 0.022621$  - SIGNIFICANT
