# Supplementary material for: Cardiac ryanodine receptor distribution is dynamic and changed by auxiliary proteins and post-translational modification
Source: eLife journal article supplement (doi:10.7554/elife.51602), 2020-01-09
Supplement: supp [file elife-51602-supp-v1.zip]

## Matlab program to analyse significance of CDF (NND, Alpha Shape Areas, TetramersPerCluster)

```
function testCDFdata(gtitle, Control, Phosphorylated, FKBP12, FKBP12_Phos, FKBP12_6, FKBP12_6_Phos)
```

```
[n1, ~] = size(Control);
n1mean=mean(Control(:));
n1median=median(Control(:));
[n2, ~] = size(Phosphorylated);
n2mean=mean(Phosphorylated(:));
n2median=median(Phosphorylated(:));
[n3, ~] = size(FKBP12(:));
n3mean=mean(FKBP12(:));
n3median=median(FKBP12(:));
[n4, ~] = size(FKBP12_Phos(:));
n4mean=mean(FKBP12_Phos(:));
n4median=median(FKBP12_Phos(:));
[n5, ~] = size(FKBP12_6(:));
n5mean=mean(FKBP12_6(:));
n5median=median(FKBP12_6(:));
[n6, ~] = size(FKBP12_6_Phos(:));
n6mean=mean(FKBP12_6_Phos(:));
n6median=median(FKBP12_6_Phos(:));

disp(' ');
disp(gtitle);
disp(['Control: # = ' num2str(n1) '; Mean = ' num2str(n1mean) '; Median = ' num2str(n1median) ]);
disp(['Phos: # = ' num2str(n2) '; Mean = ' num2str(n2mean) '; Median = ' num2str(n2median) ]);
disp(['FKBP12: # = ' num2str(n3) '; Mean = ' num2str(n3mean) '; Median = ' num2str(n3median) ]);
disp(['FKBP12_6: # = ' num2str(n5) '; Mean = ' num2str(n5mean) '; Median = ' num2str(n5median) ]);
disp(['FKBP12 + Phos: # = ' num2str(n4) '; Mean = ' num2str(n4mean) '; Median = ' num2str(n4median) ]);
disp(['FKBP12_6 + Phos: # = ' num2str(n6) '; Mean = ' num2str(n6mean) '; Median = ' num2str(n6median) ]);
disp(' ');
```

```
ncolumns = n1 + n2 + n3 + n4 + n5 + n6;
AllData=zeros(ncolumns, 2);
```

```
j = 0;
for i=1:n1
    AllData(i, 1) = Control(i, 1);
    AllData(i, 2) = 1;
end
j = j + n1;

for i=1:n2
    AllData(j+i, 1) = Phosphorylated(i, 1);
    AllData(j+i, 2) = 2;
end
j = j + n2;

for i=1:n3
    AllData(j+i, 1) = FKBP12(i, 1);
    AllData(j+i, 2) = 3;
end
j = j + n3;

for i=1:n4
    AllData(j+i, 1) = FKBP12_Phos(i, 1);
    AllData(j+i, 2) = 4;
end
j = j + n4;

for i=1:n5
    AllData(j+i, 1) = FKBP12_6(i, 1);
    AllData(j+i, 2) = 5;
end
j = j + n5;

for i=1:n6
    AllData(j+i, 1) = FKBP12_6_Phos(i, 1);
    AllData(j+i, 2) = 6;
end
```

```
disp('_____');
disp('Comparison of all data groups');
```

```
[~, pAll] = AnDarksamtest(AllData);
```

```
%-----
```

```
ControlPhos=zeros(n1+n2, 2);
```

```
for i=1:n1
```

```

ControlPhos(i, 1) = Control (i, 1);
ControlPhos(i, 2) = 1;
end
j = n1;
for i=1: n2
ControlPhos(j+i, 1) = Phosphorylated(i, 1);
ControlPhos(j+i, 2) = 2;
end

disp('_____');
disp(' Comparison of control & phosphorylated');

[~, pConPhos]=AnDarksamtest (Control Phos);
%-----
ControlFKBP12=zeros(n1+n3, 2);
for i=1: n1
ControlFKBP12(i, 1) = Control (i, 1);
ControlFKBP12(i, 2) = 1;
end
j = n1;
for i=1: n3
ControlFKBP12(j+i, 1) = FKBP12(i, 1);
ControlFKBP12(j+i, 2) = 2;
end

disp('_____');
disp(' Comparison of control & FKBP12');

[~, pConFKBP12]=AnDarksamtest (Control FKBP12);
%-----
ControlFKBP12_6=zeros(n1+n5, 2);
for i=1: n1
ControlFKBP12_6(i, 1) = Control (i, 1);
ControlFKBP12_6(i, 2) = 1;
end
j = n1;
for i=1: n5
ControlFKBP12_6(j+i, 1) = FKBP12_6(i, 1);
ControlFKBP12_6(j+i, 2) = 2;
end

disp('_____');
disp(' Comparison of control & FKBP12_6');

[~, pConFKBP12_6]=AnDarksamtest (Control FKBP12_6);
%-----
Control_FKBP12_Phos=zeros(n1+n4, 2);
for i=1: n1
Control_FKBP12_Phos(i, 1) = Control (i, 1);
Control_FKBP12_Phos(i, 2) = 1;
end
j = n1;
for i=1: n4
Control_FKBP12_Phos(j+i, 1) = FKBP12_Phos(i, 1);
Control_FKBP12_Phos(j+i, 2) = 2;
end

disp('_____');
disp(' Comparison of control & FKBP12 Phos');

[~, pConFKBP12_Phos]=AnDarksamtest (Control_FKBP12_Phos);
%-----
Control_FKBP12_6_Phos=zeros(n1+n6, 2);
for i=1: n1
Control_FKBP12_6_Phos(i, 1) = Control (i, 1);
Control_FKBP12_6_Phos(i, 2) = 1;
end
j = n1;
for i=1: n6
Control_FKBP12_6_Phos(j+i, 1) = FKBP12_6_Phos(i, 1);
Control_FKBP12_6_Phos(j+i, 2) = 2;
end

disp('_____');
disp(' Comparison of control & FKBP12.6 Phos');

[~, pConFKBP12_6_Phos]=AnDarksamtest (Control_FKBP12_6_Phos);

```

```

%-----
FKBP12_FKBP12_6=zeros(n3+n5, 2);
for i=1: n3
    FKBP12_FKBP12_6(i, 1) = FKBP12(i, 1);
    FKBP12_FKBP12_6(i, 2) = 1;
end
j = n3;

for i=1: n5
    FKBP12_FKBP12_6(j+i, 1) = FKBP12_6(i, 1);
    FKBP12_FKBP12_6(j+i, 2) = 2;
end
di sp('_____');
di sp(' Comparison of FKBP12 & FKBP12_6 ');

[~, pFKBP12_FKBP12_6]=AnDarksamtest (FKBP12_FKBP12_6);
%-----
Phos_FKBP12_Phos=zeros(n2+n4, 2);
for i=1: n2
    Phos_FKBP12_Phos(i, 1) = Phosphorylated(i, 1);
    Phos_FKBP12_Phos(i, 2) = 1;
end
j = n2;

for i=1: n4
    Phos_FKBP12_Phos(j+i, 1) = FKBP12_Phos(i, 1);
    Phos_FKBP12_Phos(j+i, 2) = 2;
end

di sp('_____');
di sp(' Comparison of Phosphorylated vs FKBP12 phos ');
[~, pPhos_FKBP12_Phos]=AnDarksamtest (Phos_FKBP12_Phos);

%-----
FKBP12_FKBP_12_phos=zeros(n3+n4, 2);
for i=1: n3
    FKBP12_FKBP_12_phos(i, 1) = FKBP12(i, 1);
    FKBP12_FKBP_12_phos(i, 2) = 1;
end
j = n3;

for i=1: n4
    FKBP12_FKBP_12_phos(j+i, 1) = FKBP12_Phos(i, 1);
    FKBP12_FKBP_12_phos(j+i, 2) = 2;
end

di sp('_____');
di sp(' Comparison of FKBP12 vs FKBP12 phos ');

[~, pFKBP12_FKBP12_Phos]=AnDarksamtest (FKBP12_FKBP_12_phos);
%-----
FKBP12_6_FKBP_12_6_phos=zeros(n5+n6, 2);
for i=1: n5
    FKBP12_6_FKBP_12_6_phos(i, 1) = FKBP12_6(i, 1);
    FKBP12_6_FKBP_12_6_phos(i, 2) = 1;
end
j = n5;

for i=1: n6
    FKBP12_6_FKBP_12_6_phos(j+i, 1) = FKBP12_6_Phos(i, 1);
    FKBP12_6_FKBP_12_6_phos(j+i, 2) = 2;
end

di sp('_____');
di sp(' Comparison ofFKBP12. 6 vs FKBP12. 6 phos ');

[~, pFKBP12_6_FKBP12_6_Phos]=AnDarksamtest (FKBP12_6_FKBP_12_6_phos);
%-----
Phos_FKBP12_6_Phos=zeros(n2+n6, 2);
for i=1: n2
    Phos_FKBP12_6_Phos(i, 1) = Phosphorylated(i, 1);
    Phos_FKBP12_6_Phos(i, 2) = 1;
end
j = n2;

for i=1: n6
    Phos_FKBP12_6_Phos(j+i, 1) = FKBP12_6_Phos(i, 1);
    Phos_FKBP12_6_Phos(j+i, 2) = 2;
end

di sp('_____');
di sp(' Comparison of Phosphorylated vs FKBP12. 6 phos ');

[~, pPhos_FKBP12_6_Phos]=AnDarksamtest (Phos_FKBP12_6_Phos);

```

```

%-----
FKBP12_Phos_FKBP12_6_Phos=zeros(n4+n6, 2);

for i=1:n4
    FKBP12_Phos_FKBP12_6_Phos(j+i, 1) = FKBP12_Phos(i, 1);
    FKBP12_Phos_FKBP12_6_Phos(j+i, 2) = 1;
end
j=j+n4;

for i=1:n6
    FKBP12_Phos_FKBP12_6_Phos(j+i, 1) = FKBP12_6_Phos(i, 1);
    FKBP12_Phos_FKBP12_6_Phos(j+i, 2) = 2;
end

di sp('_____');
di sp('Comparison of FKBP12 phos & FKBP12.6 phos');
[~, pFKBP12_Phos_FKBP12_6_Phos]=AnDarksamtest (FKBP12_Phos_FKBP12_6_Phos);

di sp('_____');
di sp('Using the Anderson-Darling k sample test (corrected for ties)');
di sp(' ');
di sp(checksig(['All ' gtitle], pAll));
di sp(checksig('Control vs phosphorylated', pConPhos));
di sp(checksig('Control vs FKBP12', pConFKBP12));
di sp(checksig('Control vs FKBP12.6', pConFKBP12_6));
di sp(checksig('Control vs FKBP12 phos', pConFKBP12_Phos));
di sp(checksig('Control vs FKBP12.6 phos', pConFKBP12_6_Phos));
di sp(checksig('FKBP12 vs FKBP12 phos', pFKBP12_FKBP12_Phos));
di sp(checksig('FKBP12.6 vs FKBP12.6 phos', pFKBP12_6_FKBP12_6_Phos));
di sp(checksig('FKBP12 vs FKBP12.6', pFKBP12_FKBP12_6));
di sp(checksig('FKBP12 phos vs FKBP12.6 phos', pFKBP12_Phos_FKBP12_6_Phos));
di sp(checksig('Phosphorylated vs FKBP12 phos', pPhos_FKBP12_Phos));
di sp(checksig('Phosphorylated vs FKBP12.6 phos', pPhos_FKBP12_6_Phos));

end

function [sig] = checksig(title, pval)
sig = [title ' : p = ' num2str(pval)];
if(pval < 0.05)
    sig =[sig ' - SIGNIFICANT' ];
else
    sig =[sig ' - NS' ];
end
end

```

The program AnDarksamtest.m was created by A. Trujillo-Ortiz, R. Hernandez-Walls, K. Barba-Rojo, L. Cupul-Magana and R.C. Zavala-Garcia, Facultad de Ciencias Marinas, Universidad Autonoma de Baja California and is not ours to share. It can be obtained from the Matlab Central file exchange.
