# Supplementary figures and images for: Cardiac ryanodine receptor distribution is dynamic and changed by auxiliary proteins and post-translational modification
Source: eLife journal article supplement (doi:10.7554/elife.51602), 2020-01-09

Figure 6 - figure supplement 1

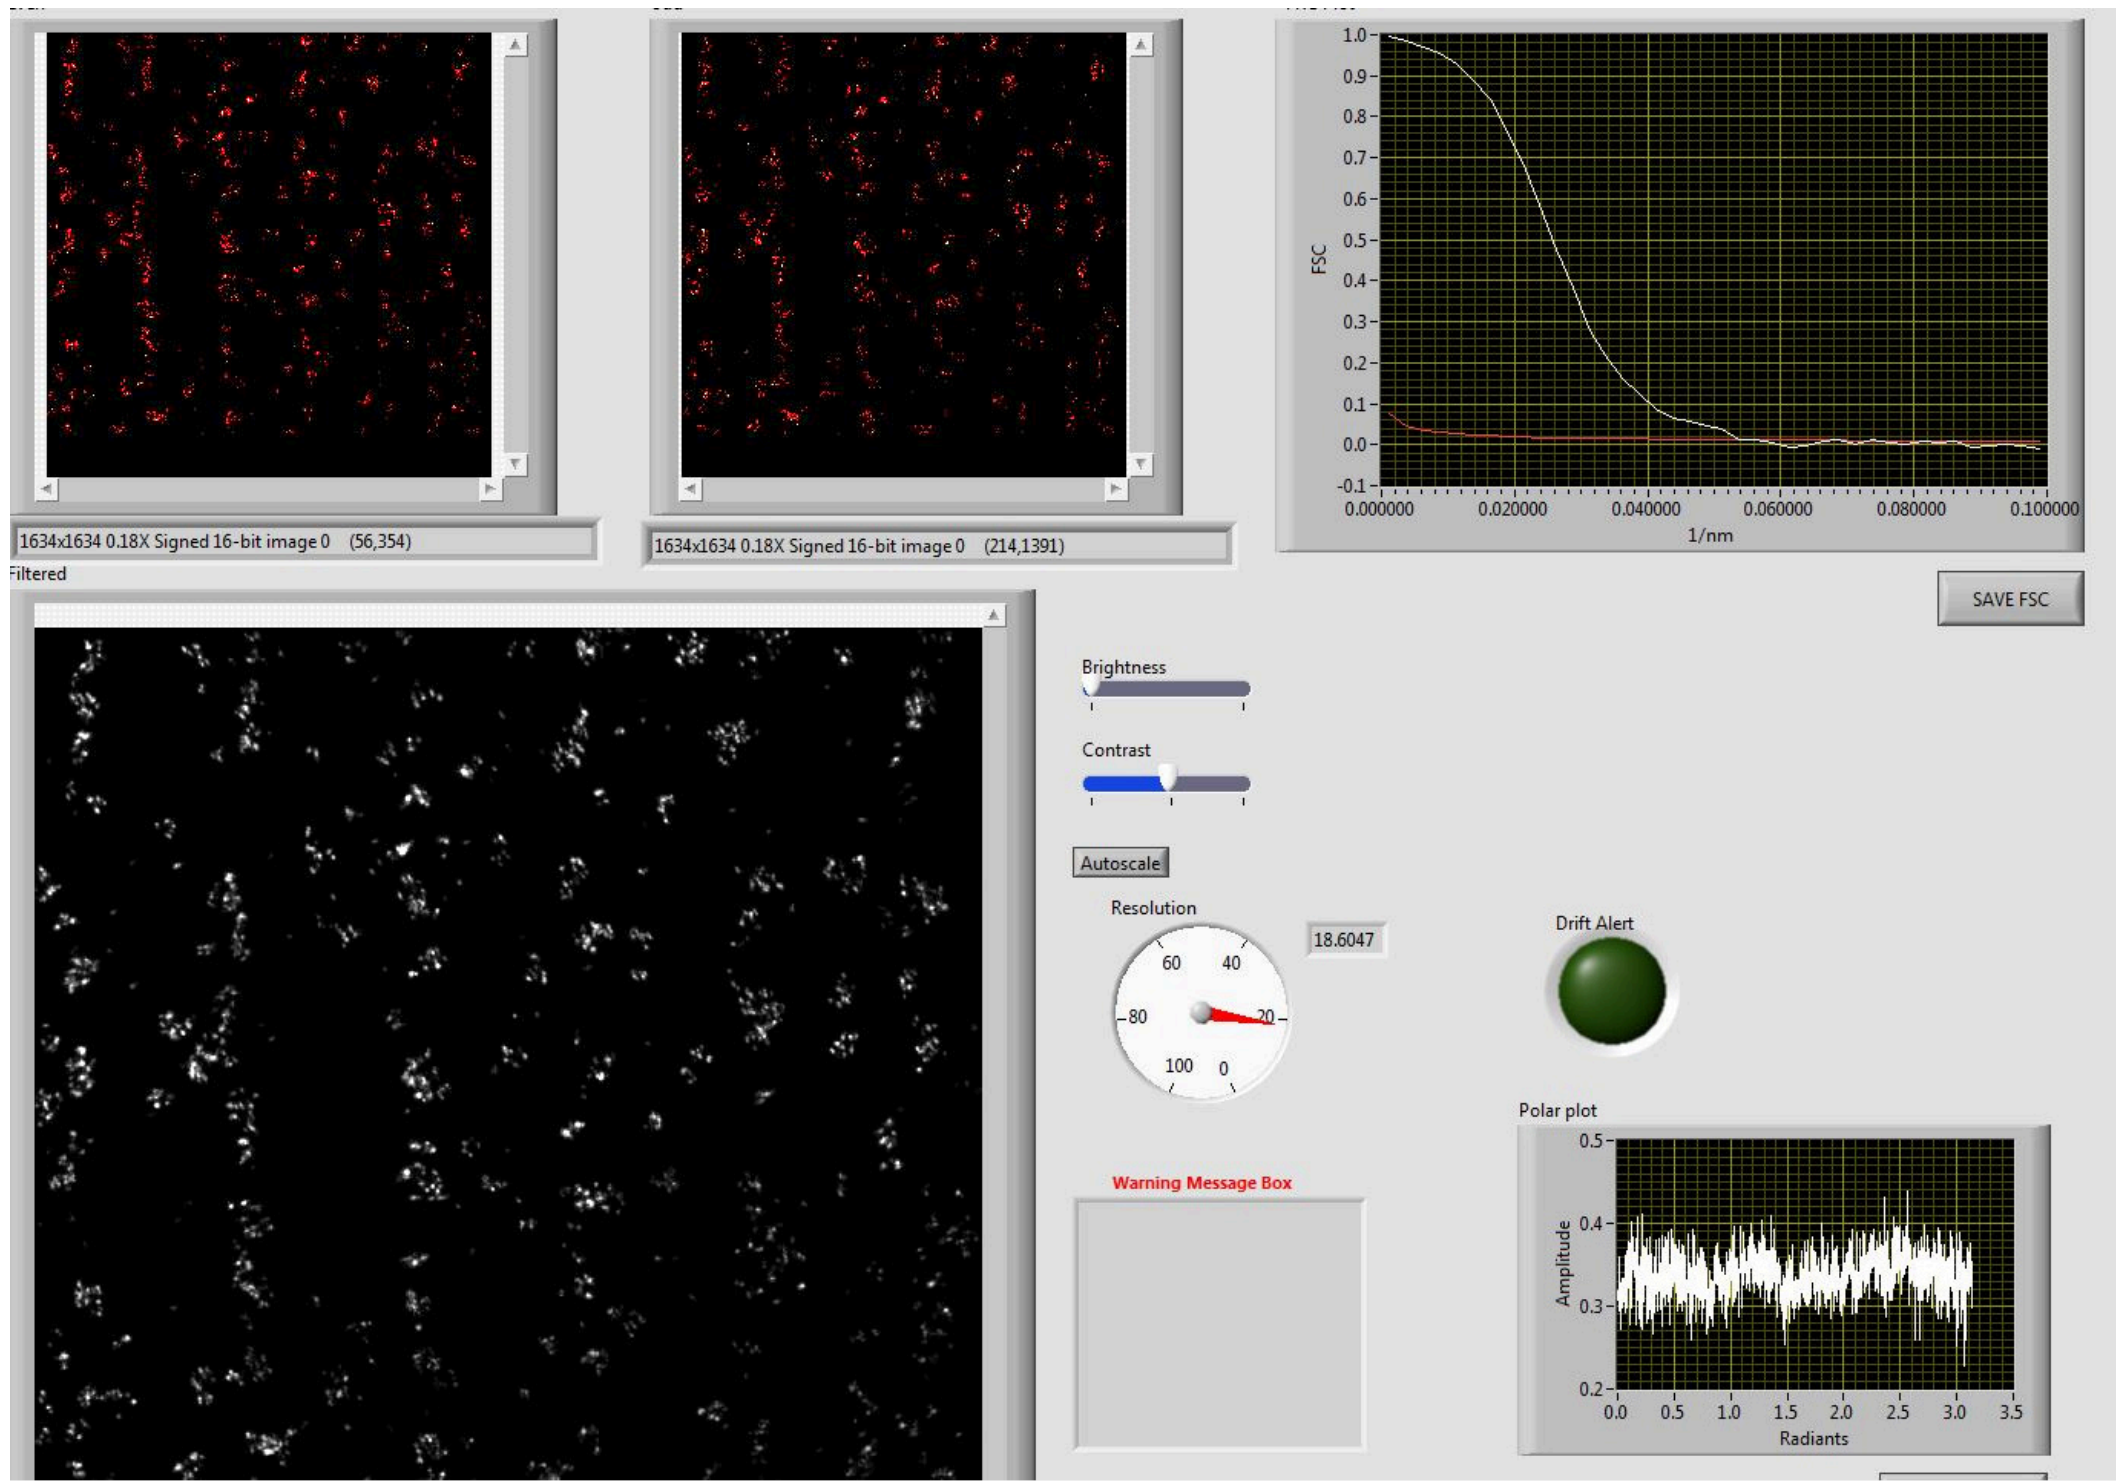

Supplement: supp [file elife-51602-supp-v1.zip]

Figure 2 - figure supplement 1

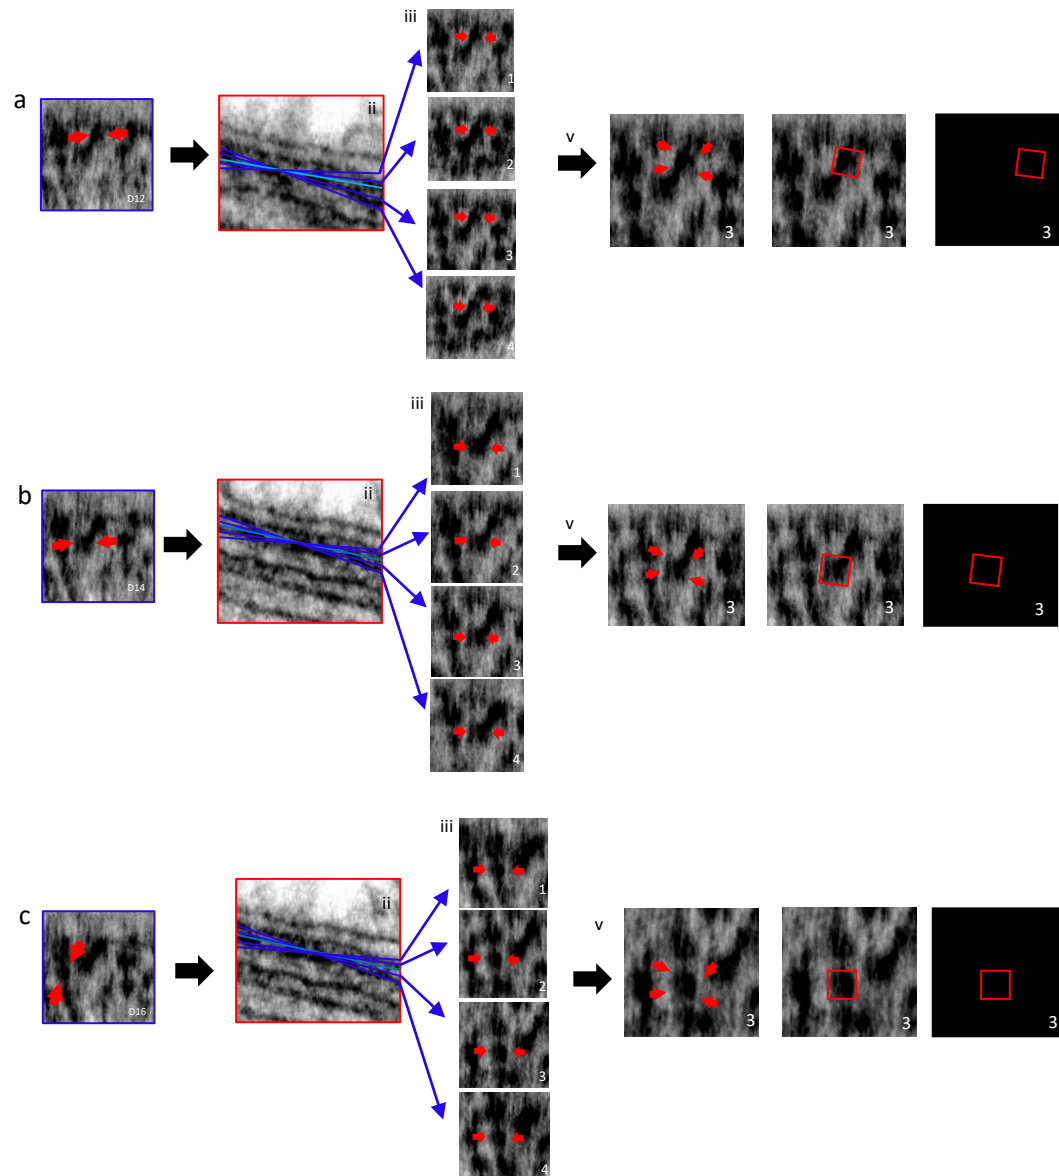

Supplement: supp [file elife-51602-supp-v1.zip]
